# Supplementary figures and images for: Inferring Gene Regulatory Networks from RNA-seq Data Using Kernel Classification
Source: MDPI journal article supplement (doi:10.3390/biology12040518), 2023-03-29

# RNA-seq TPM ROC curve

## REWKLR

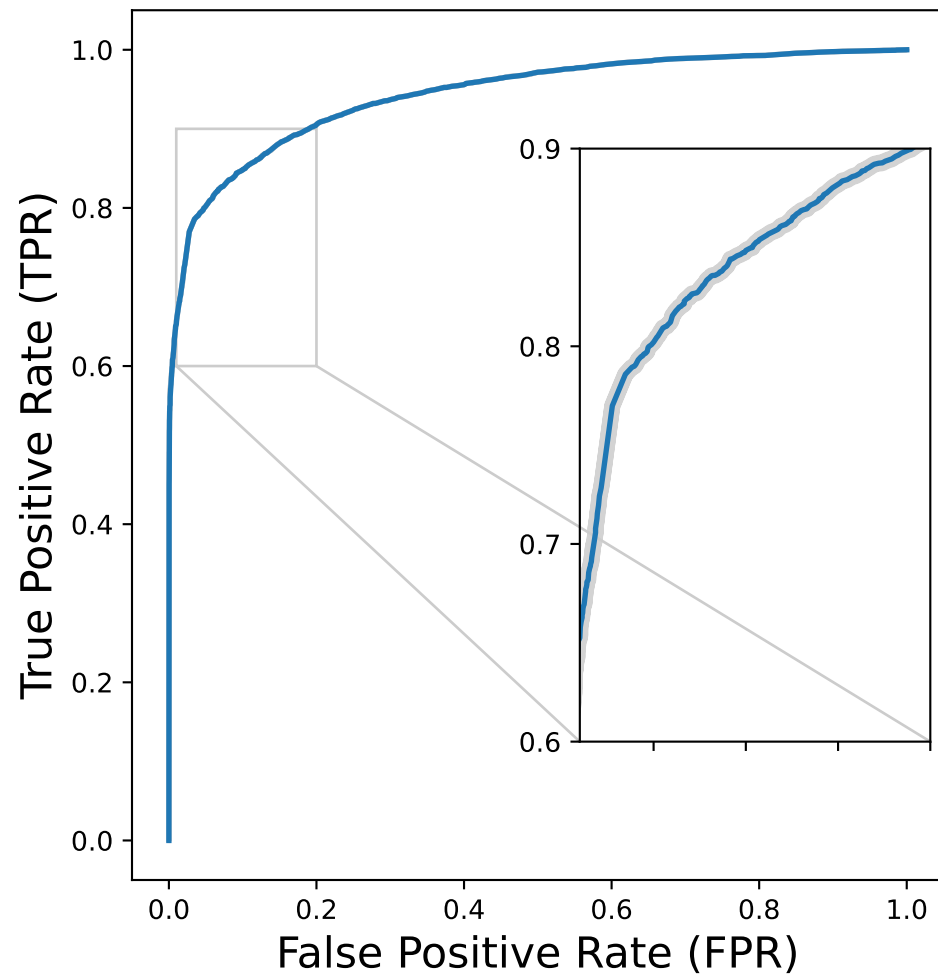

## SVM

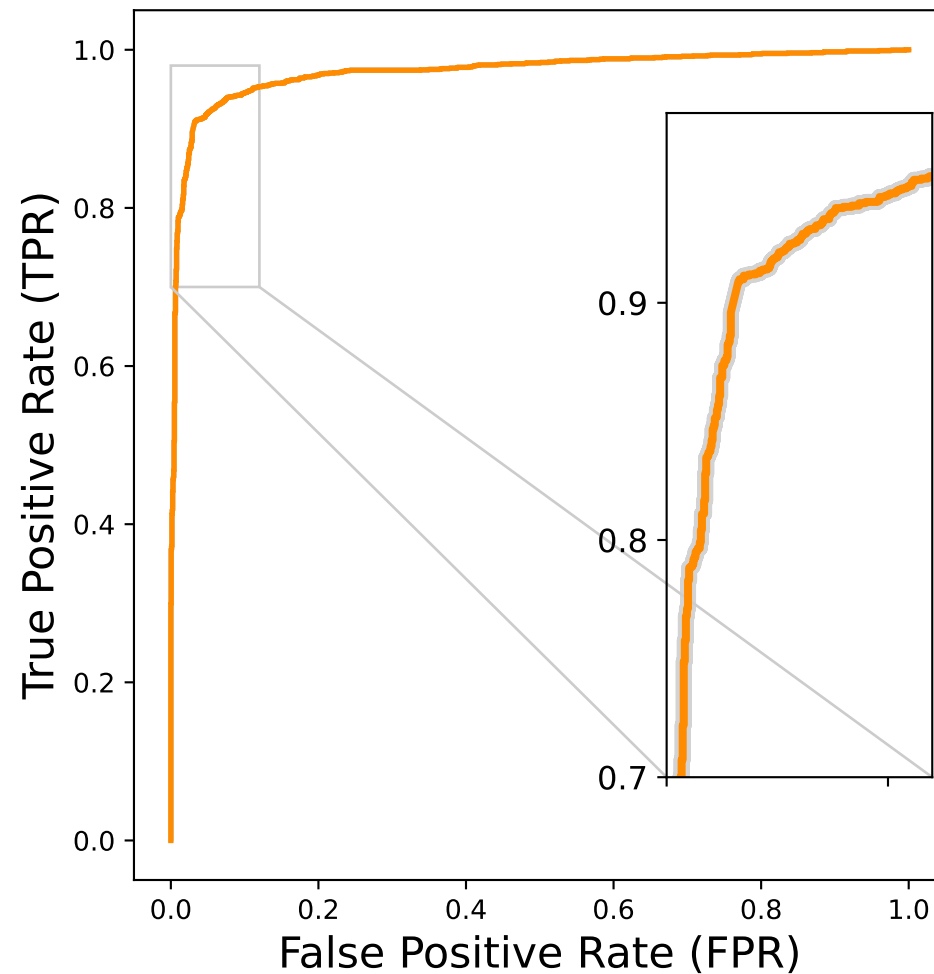

Supplement: s1 [file s1]

# RNA-seq FPKM PR curve

## REWKLR

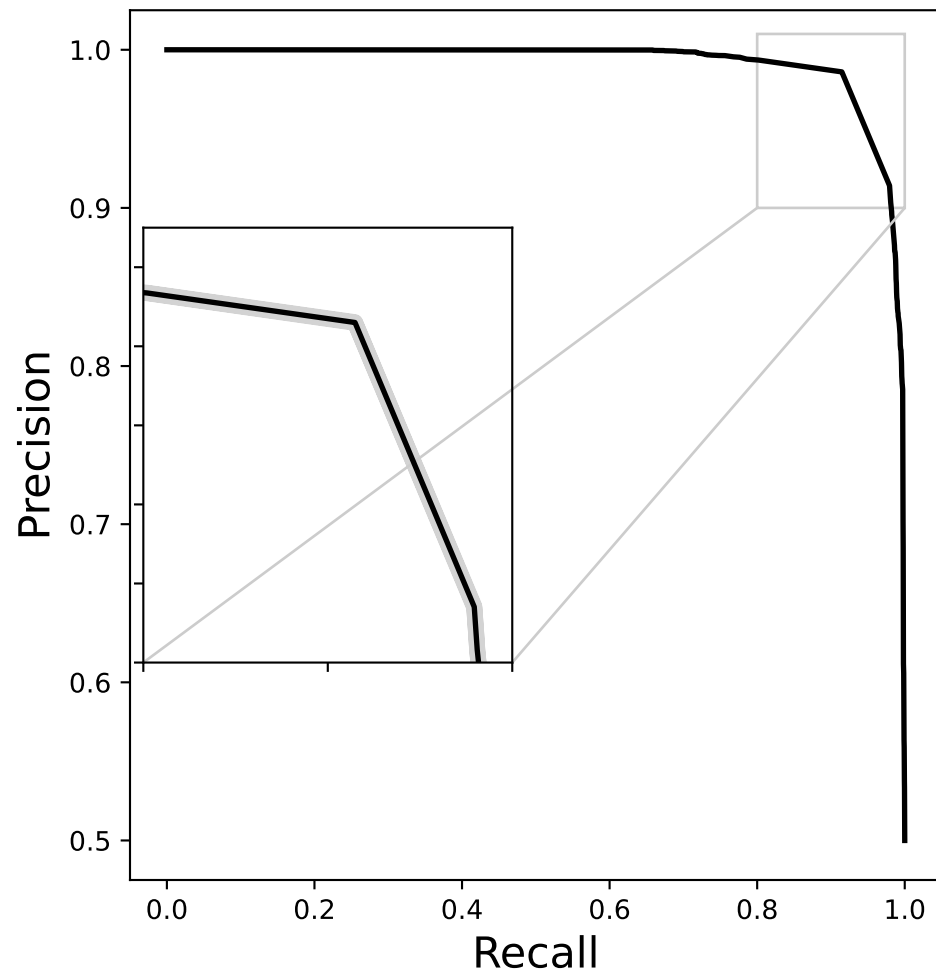

## SVM

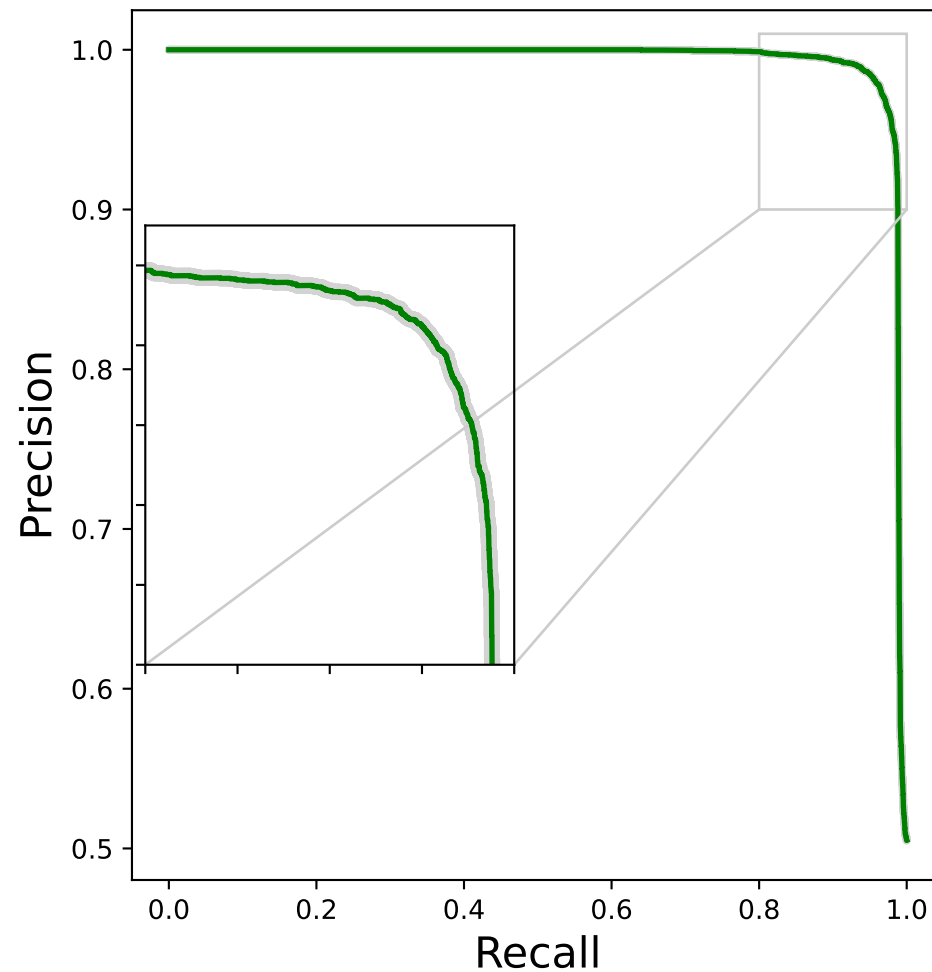

Supplement: s1 [file s1]

# Microarray ROC curve

## REWKLR

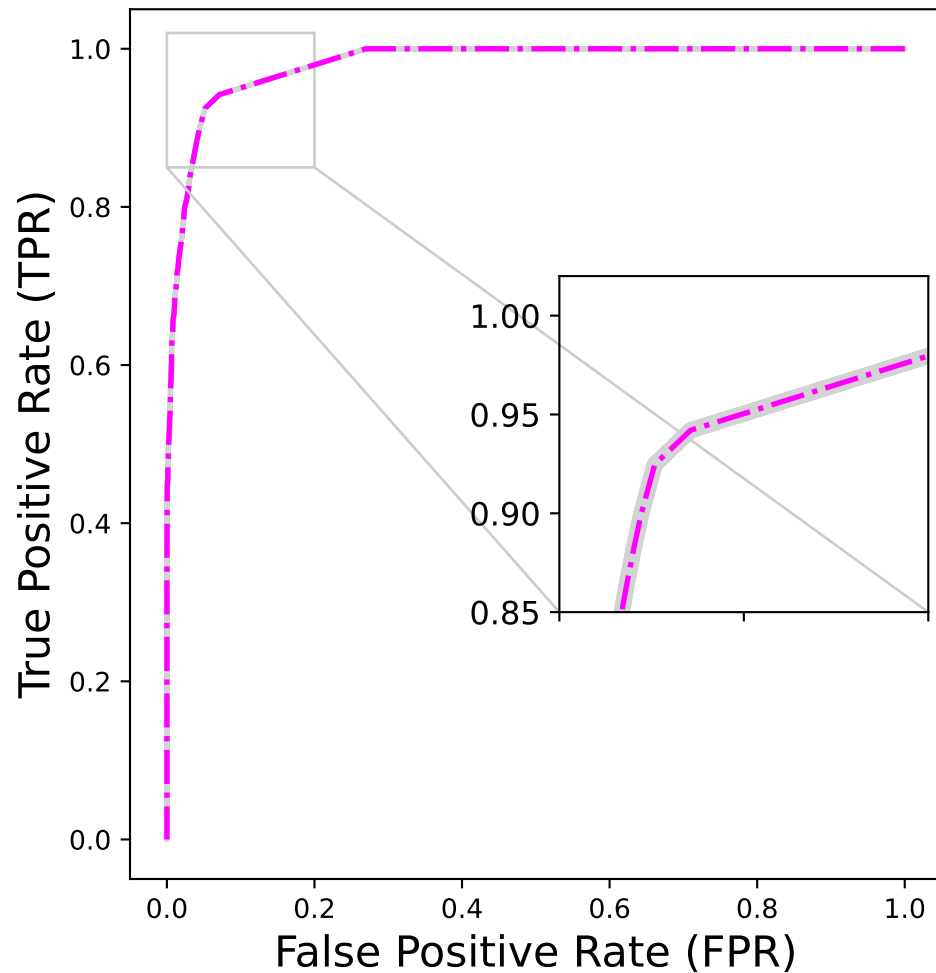

## SVM

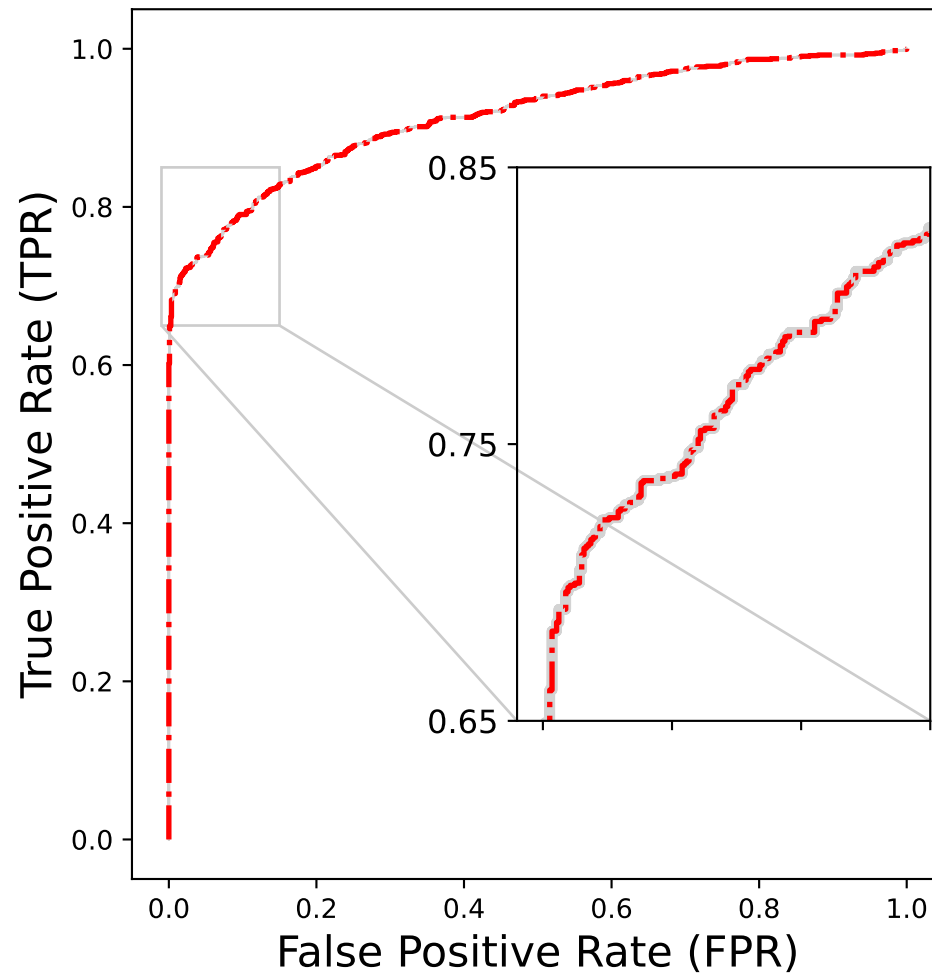

Supplement: s1 [file s1]

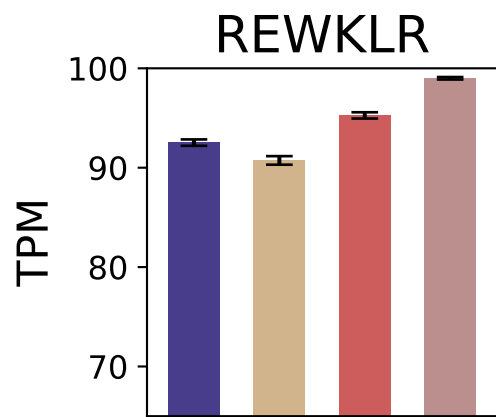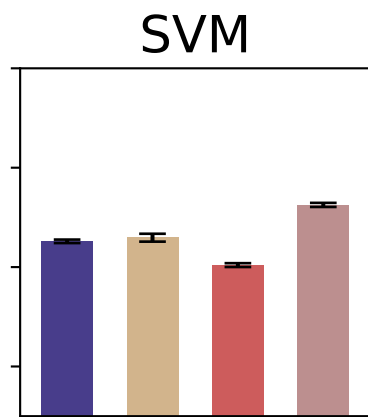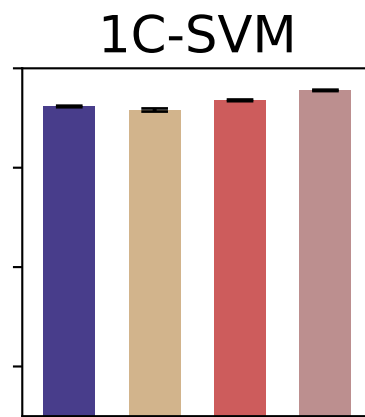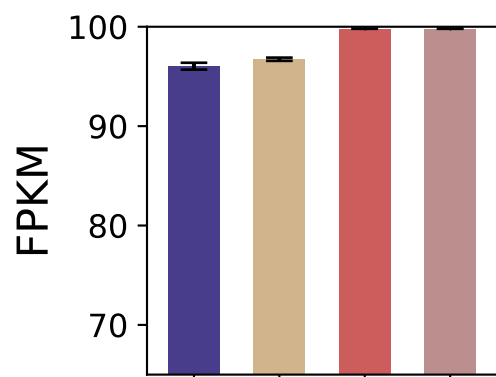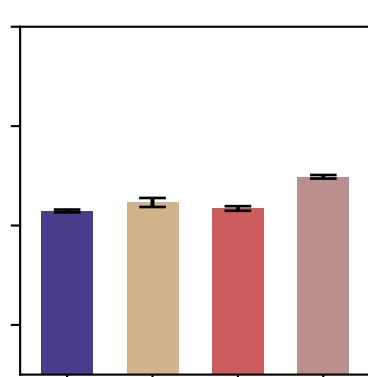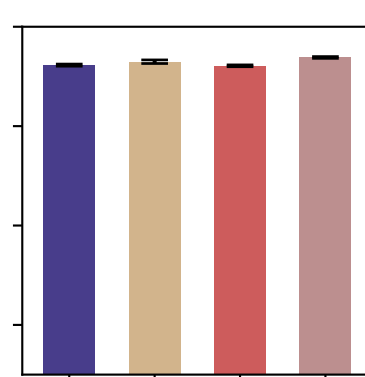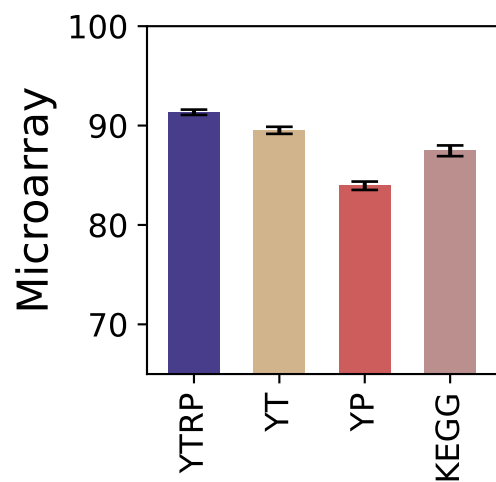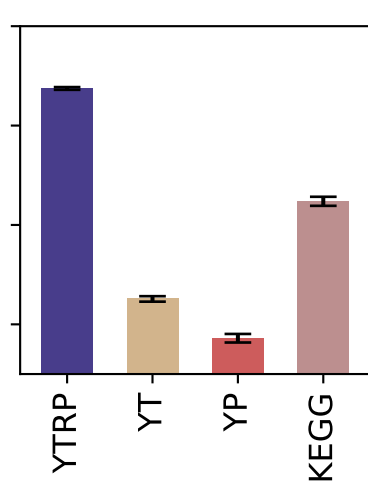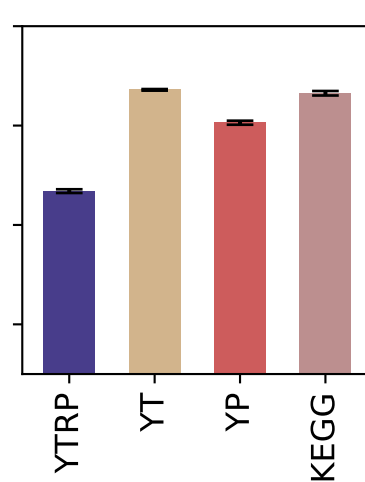

Supplement: s1 [file s1]

# Microarray PR curve

## REWKLR

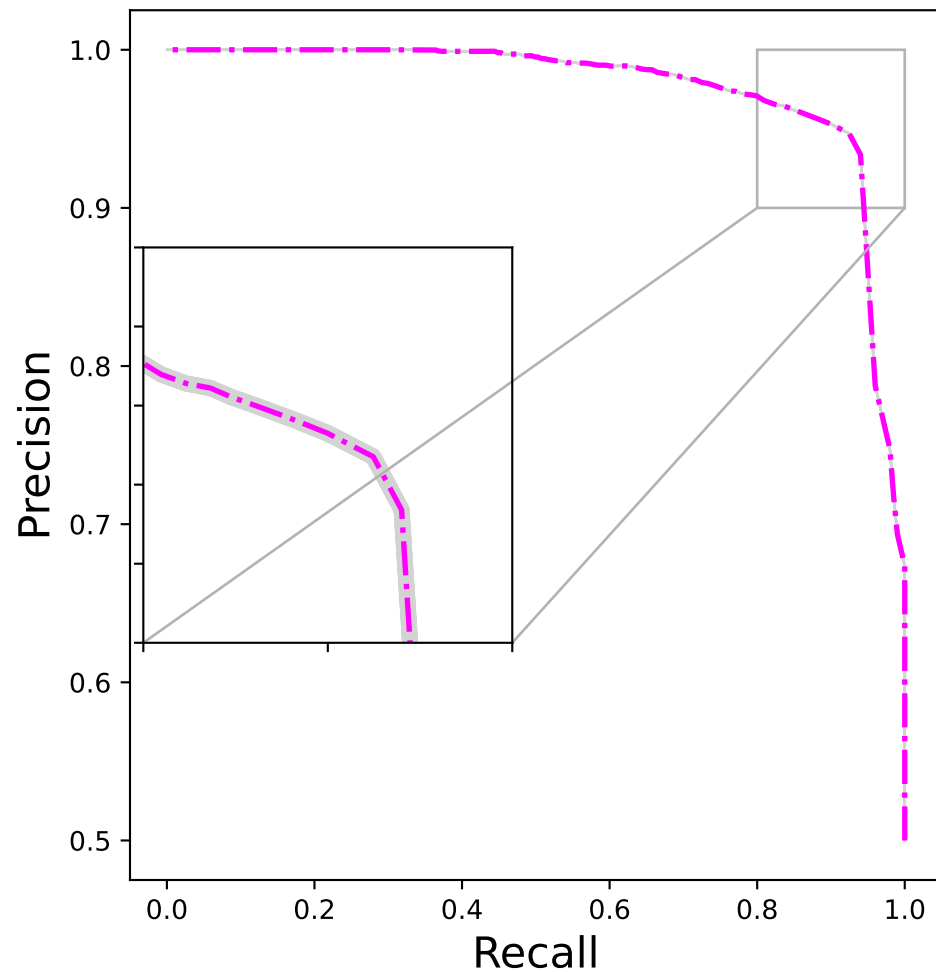

## SVM

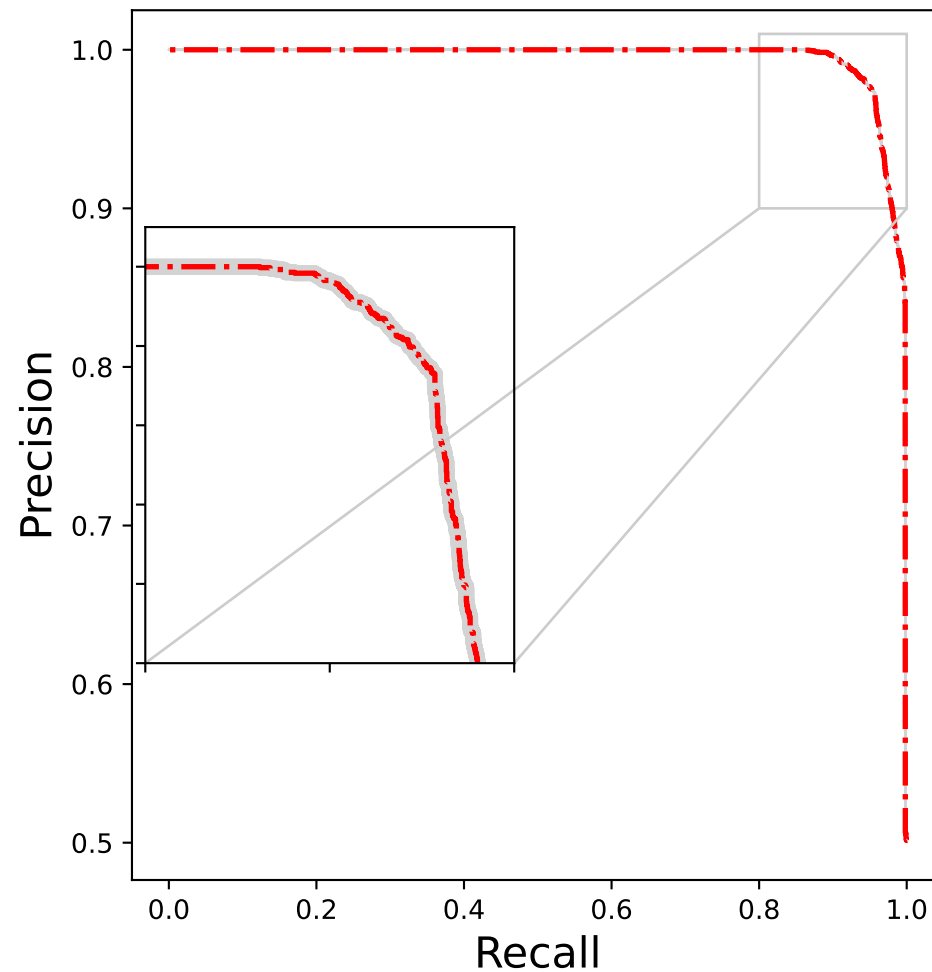

Supplement: s1 [file s1]

# RNA-seq TPM PR curve

## REWKLR

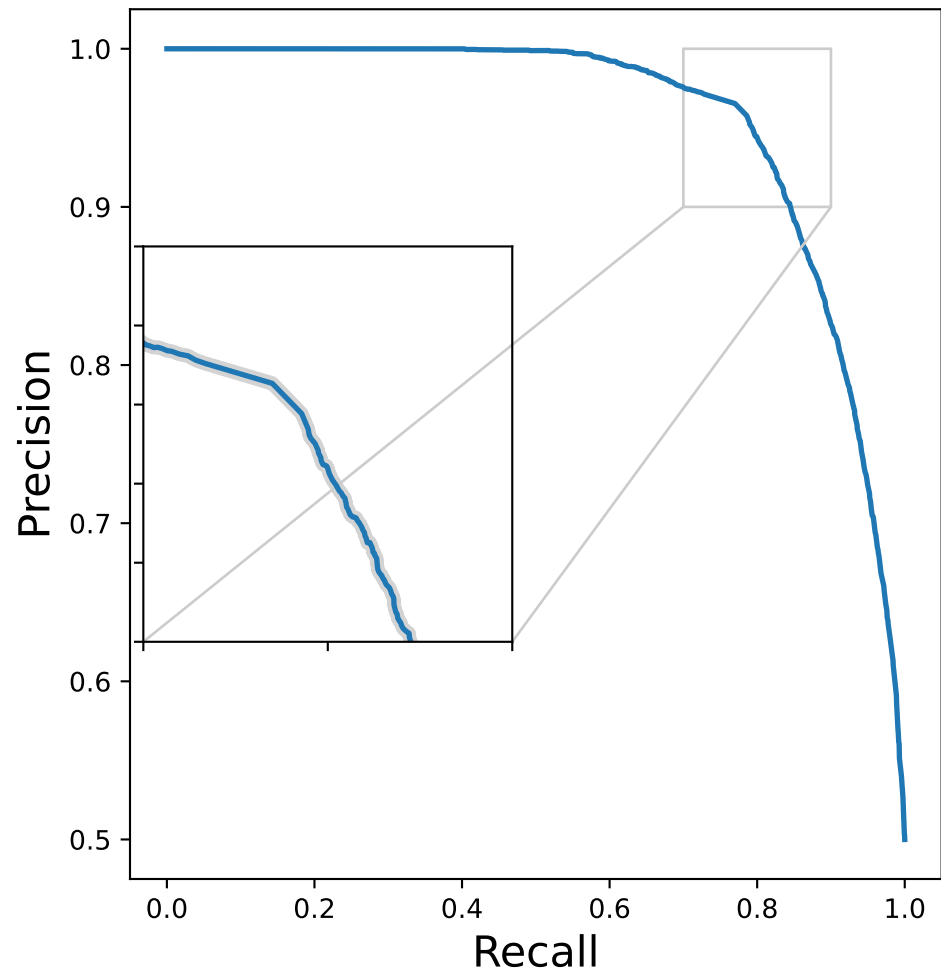

## SVM

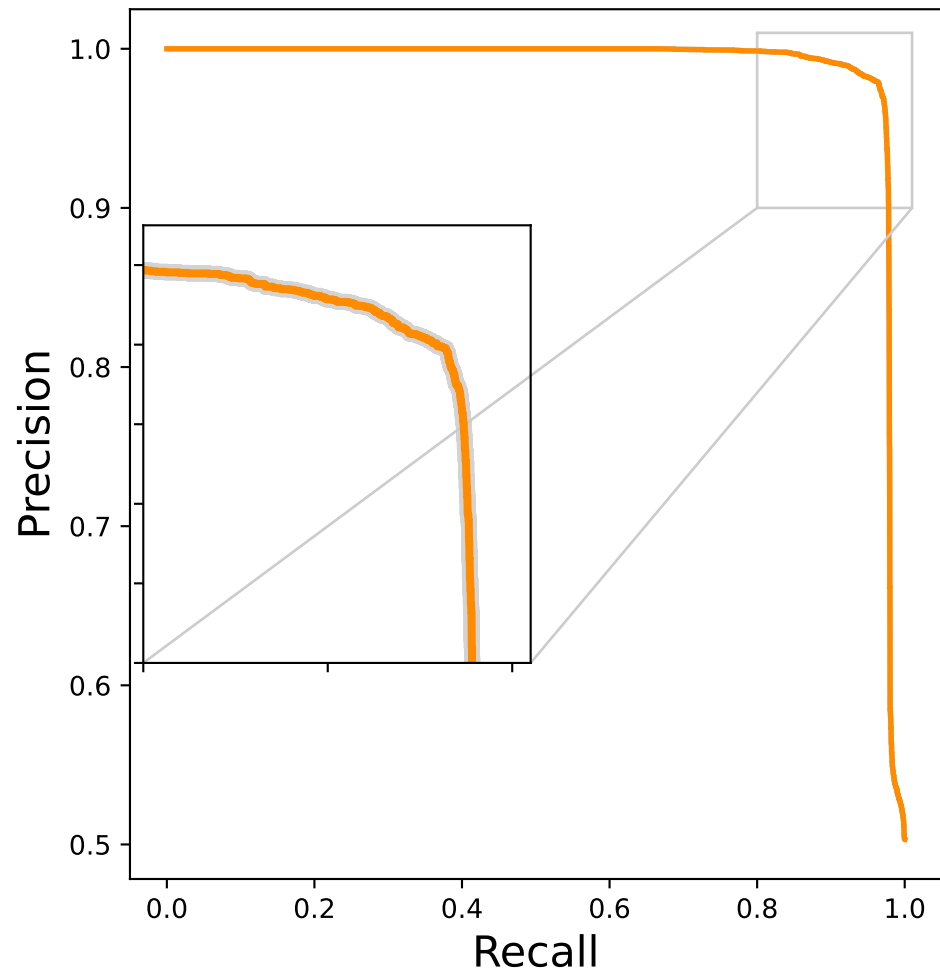

Supplement: s1 [file s1]

# RNA-seq FPKM ROC curve

## REWKLR

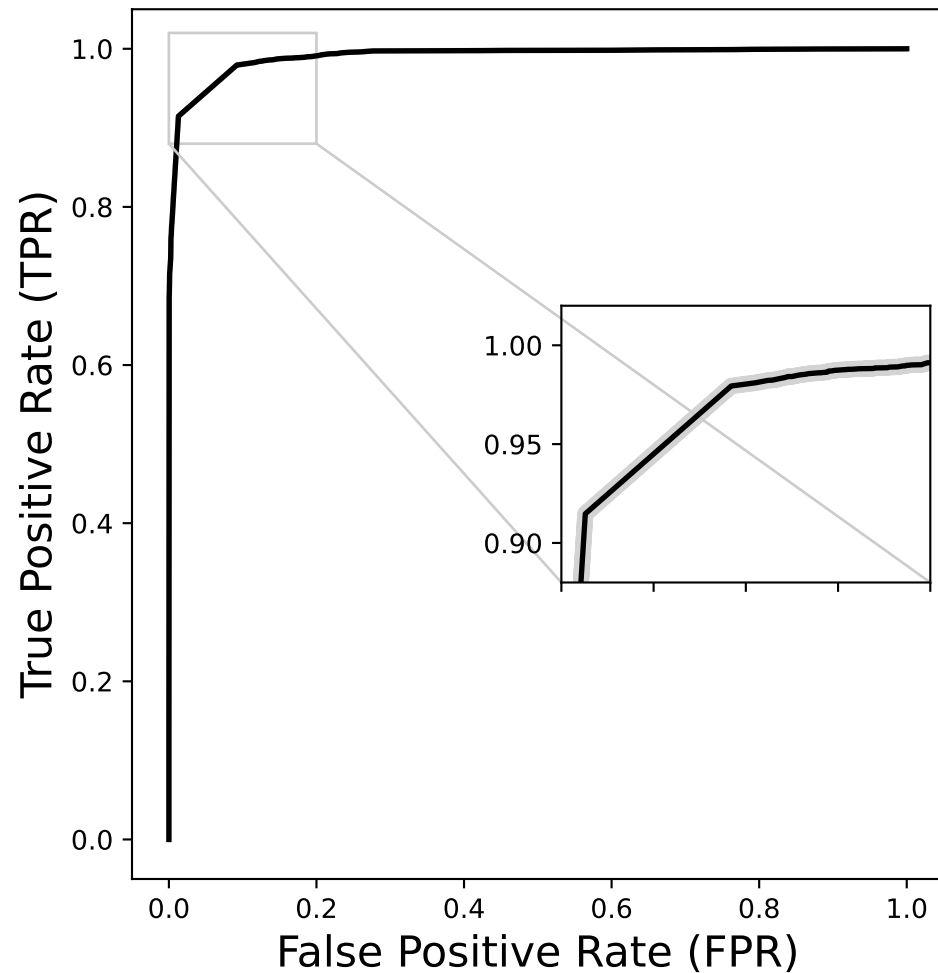

## SVM

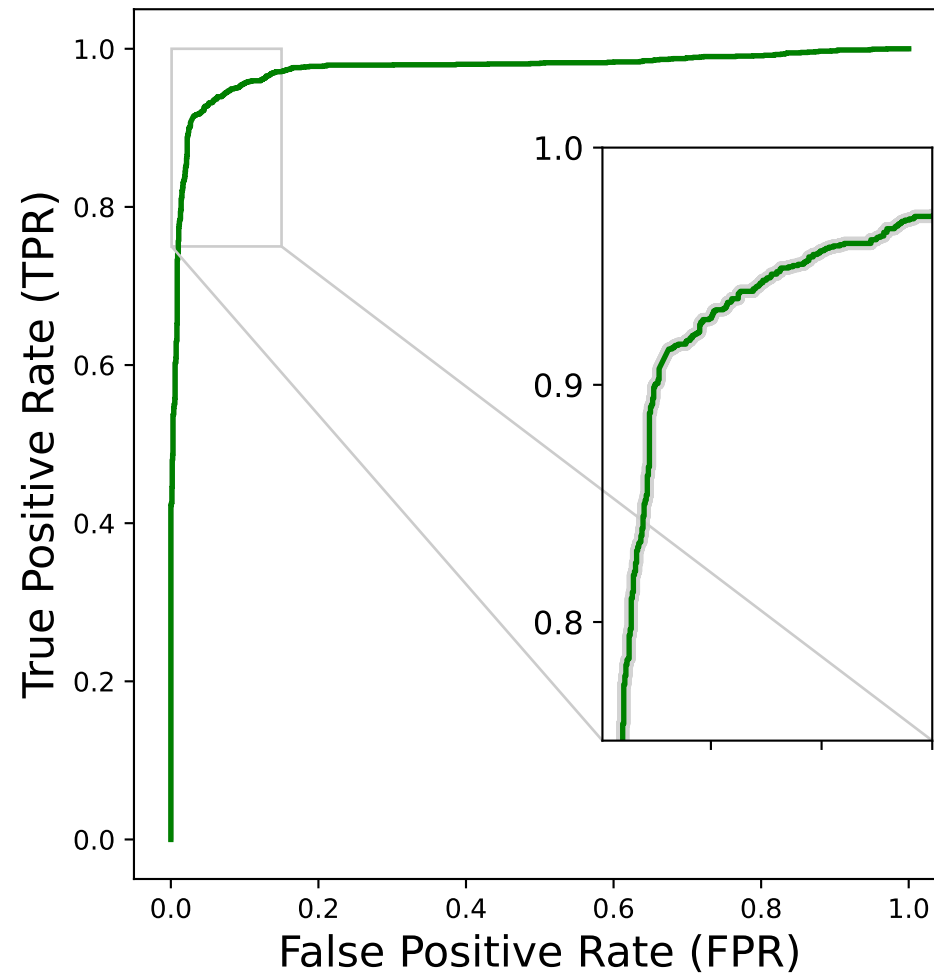

Supplement: s1 [file s1]
